# Supplementary material for: Expanded sampling of New Zealand glass sponges (Porifera: Hexactinellida) provides new insights into biodiversity, chemodiversity, and phylogeny of the class
Source: PeerJ journal article supplement (doi:10.7717/peerj.15017), 2023-04-27

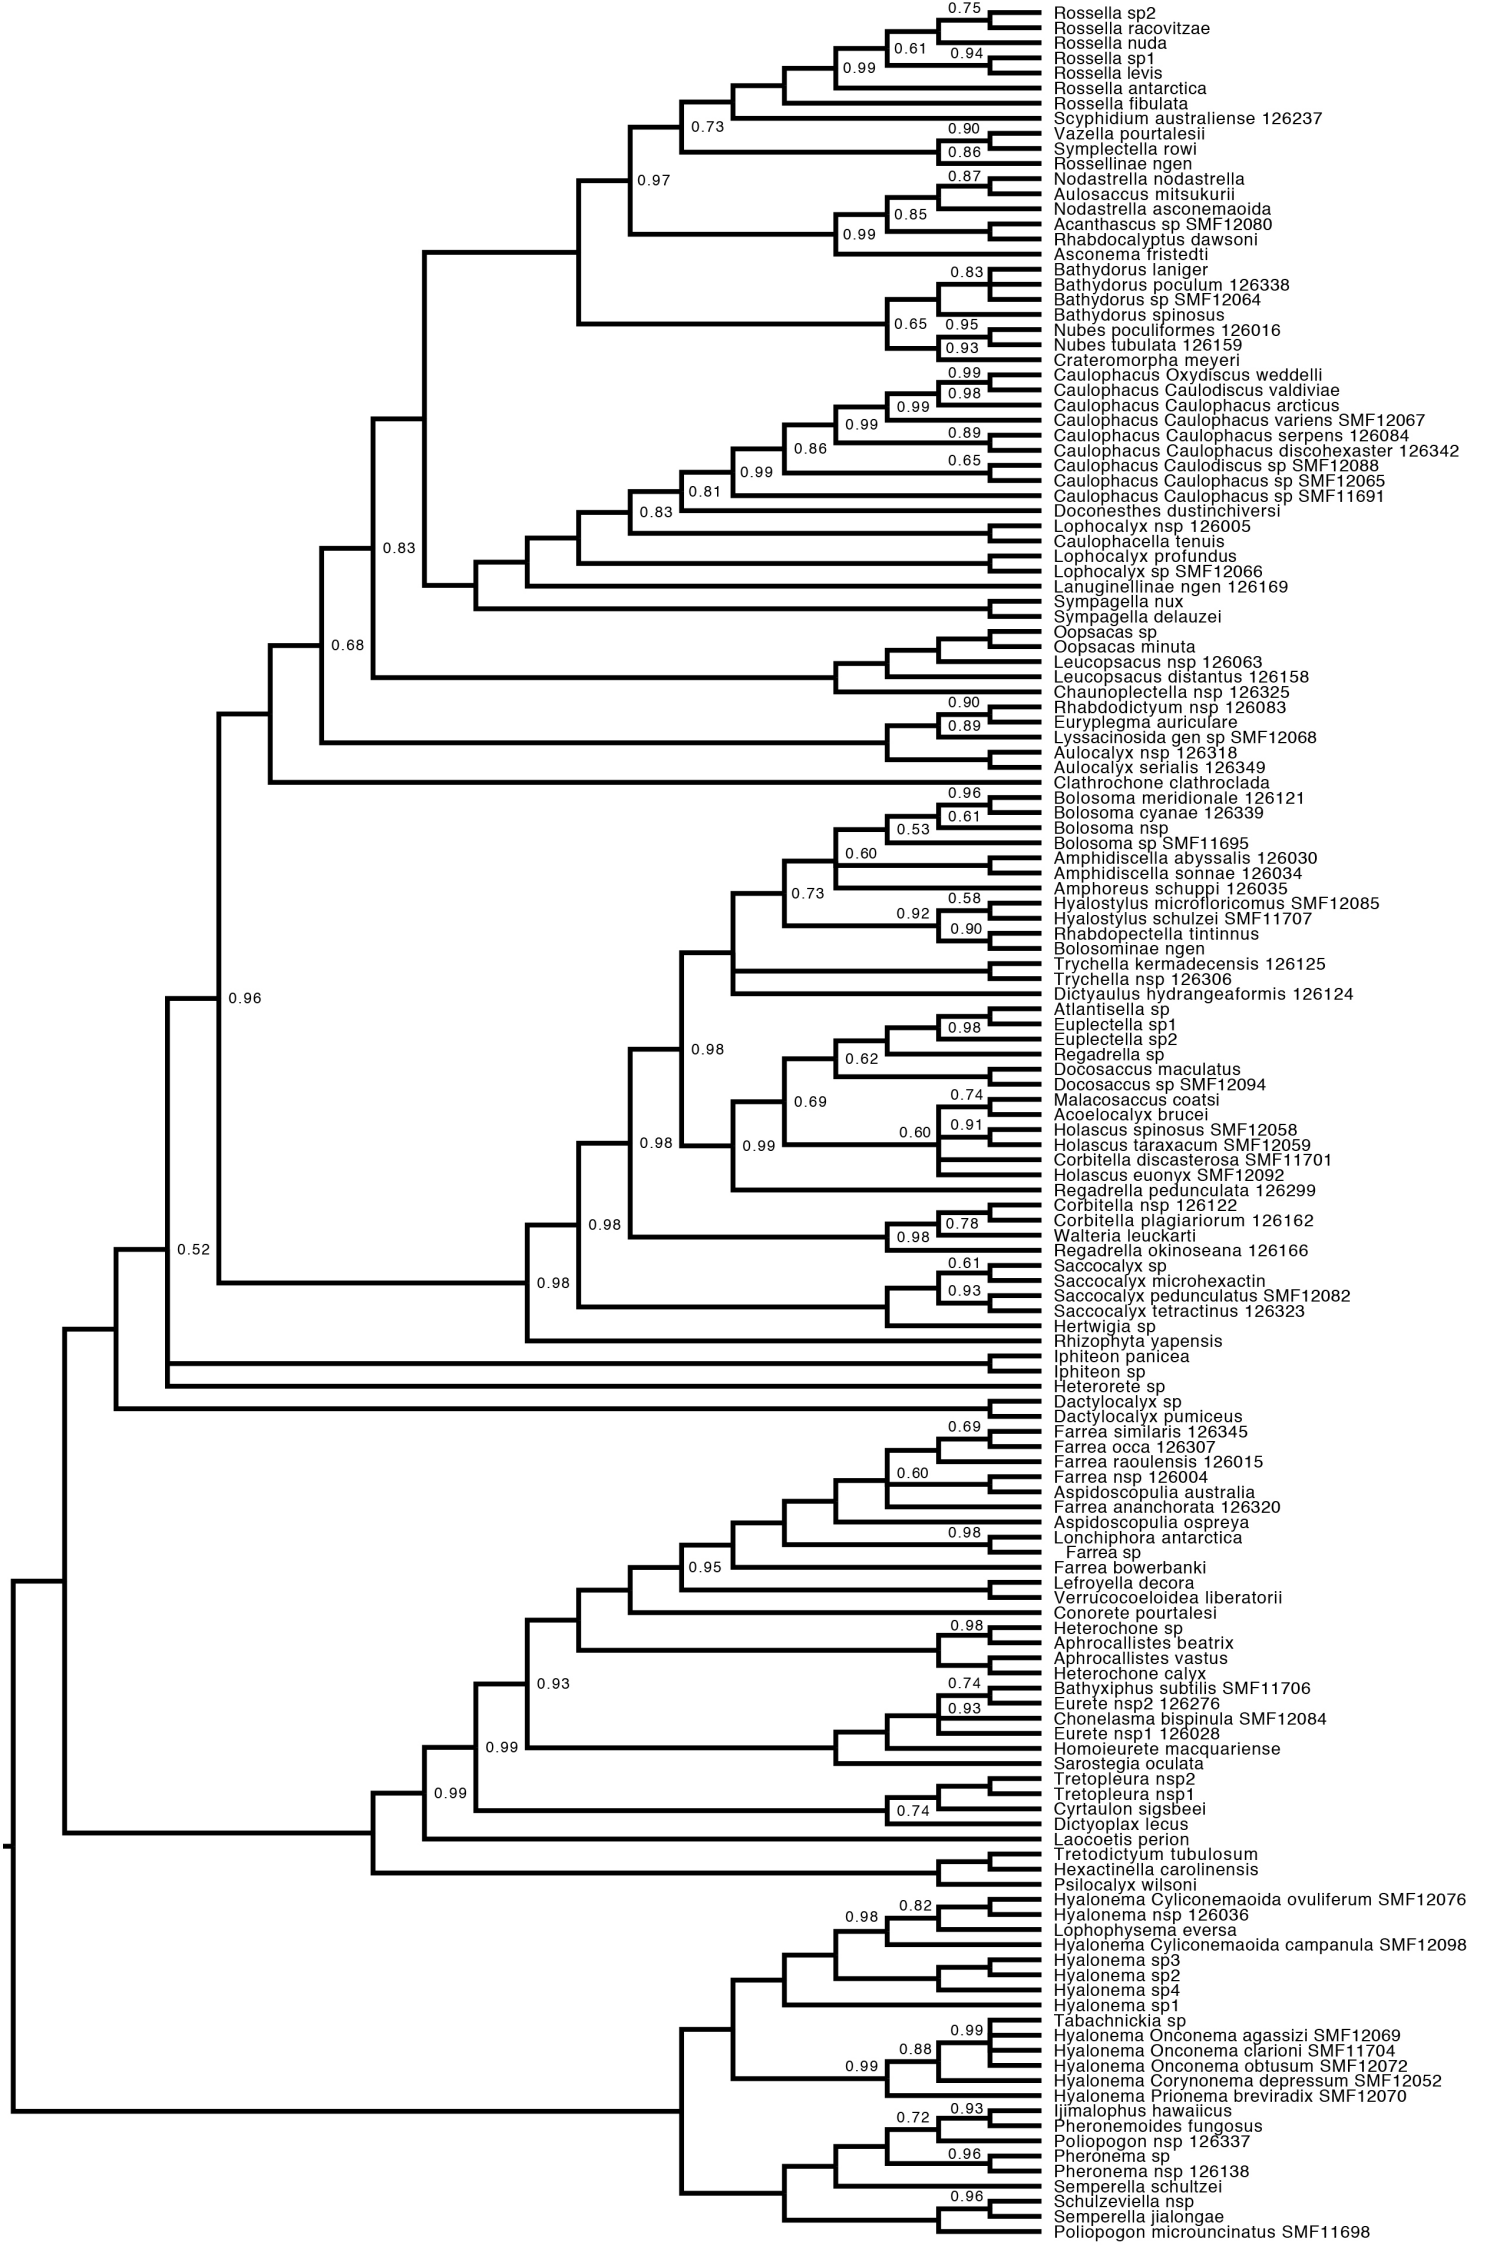

Supplement: FigS4.pdf [file FigS4.pdf]
