# Supplementary material for: Expanded sampling of New Zealand glass sponges (Porifera: Hexactinellida) provides new insights into biodiversity, chemodiversity, and phylogeny of the class
Source: PeerJ journal article supplement (doi:10.7717/peerj.15017), 2023-04-27
Supplement: FigS5.pdf [file FigS5.pdf]

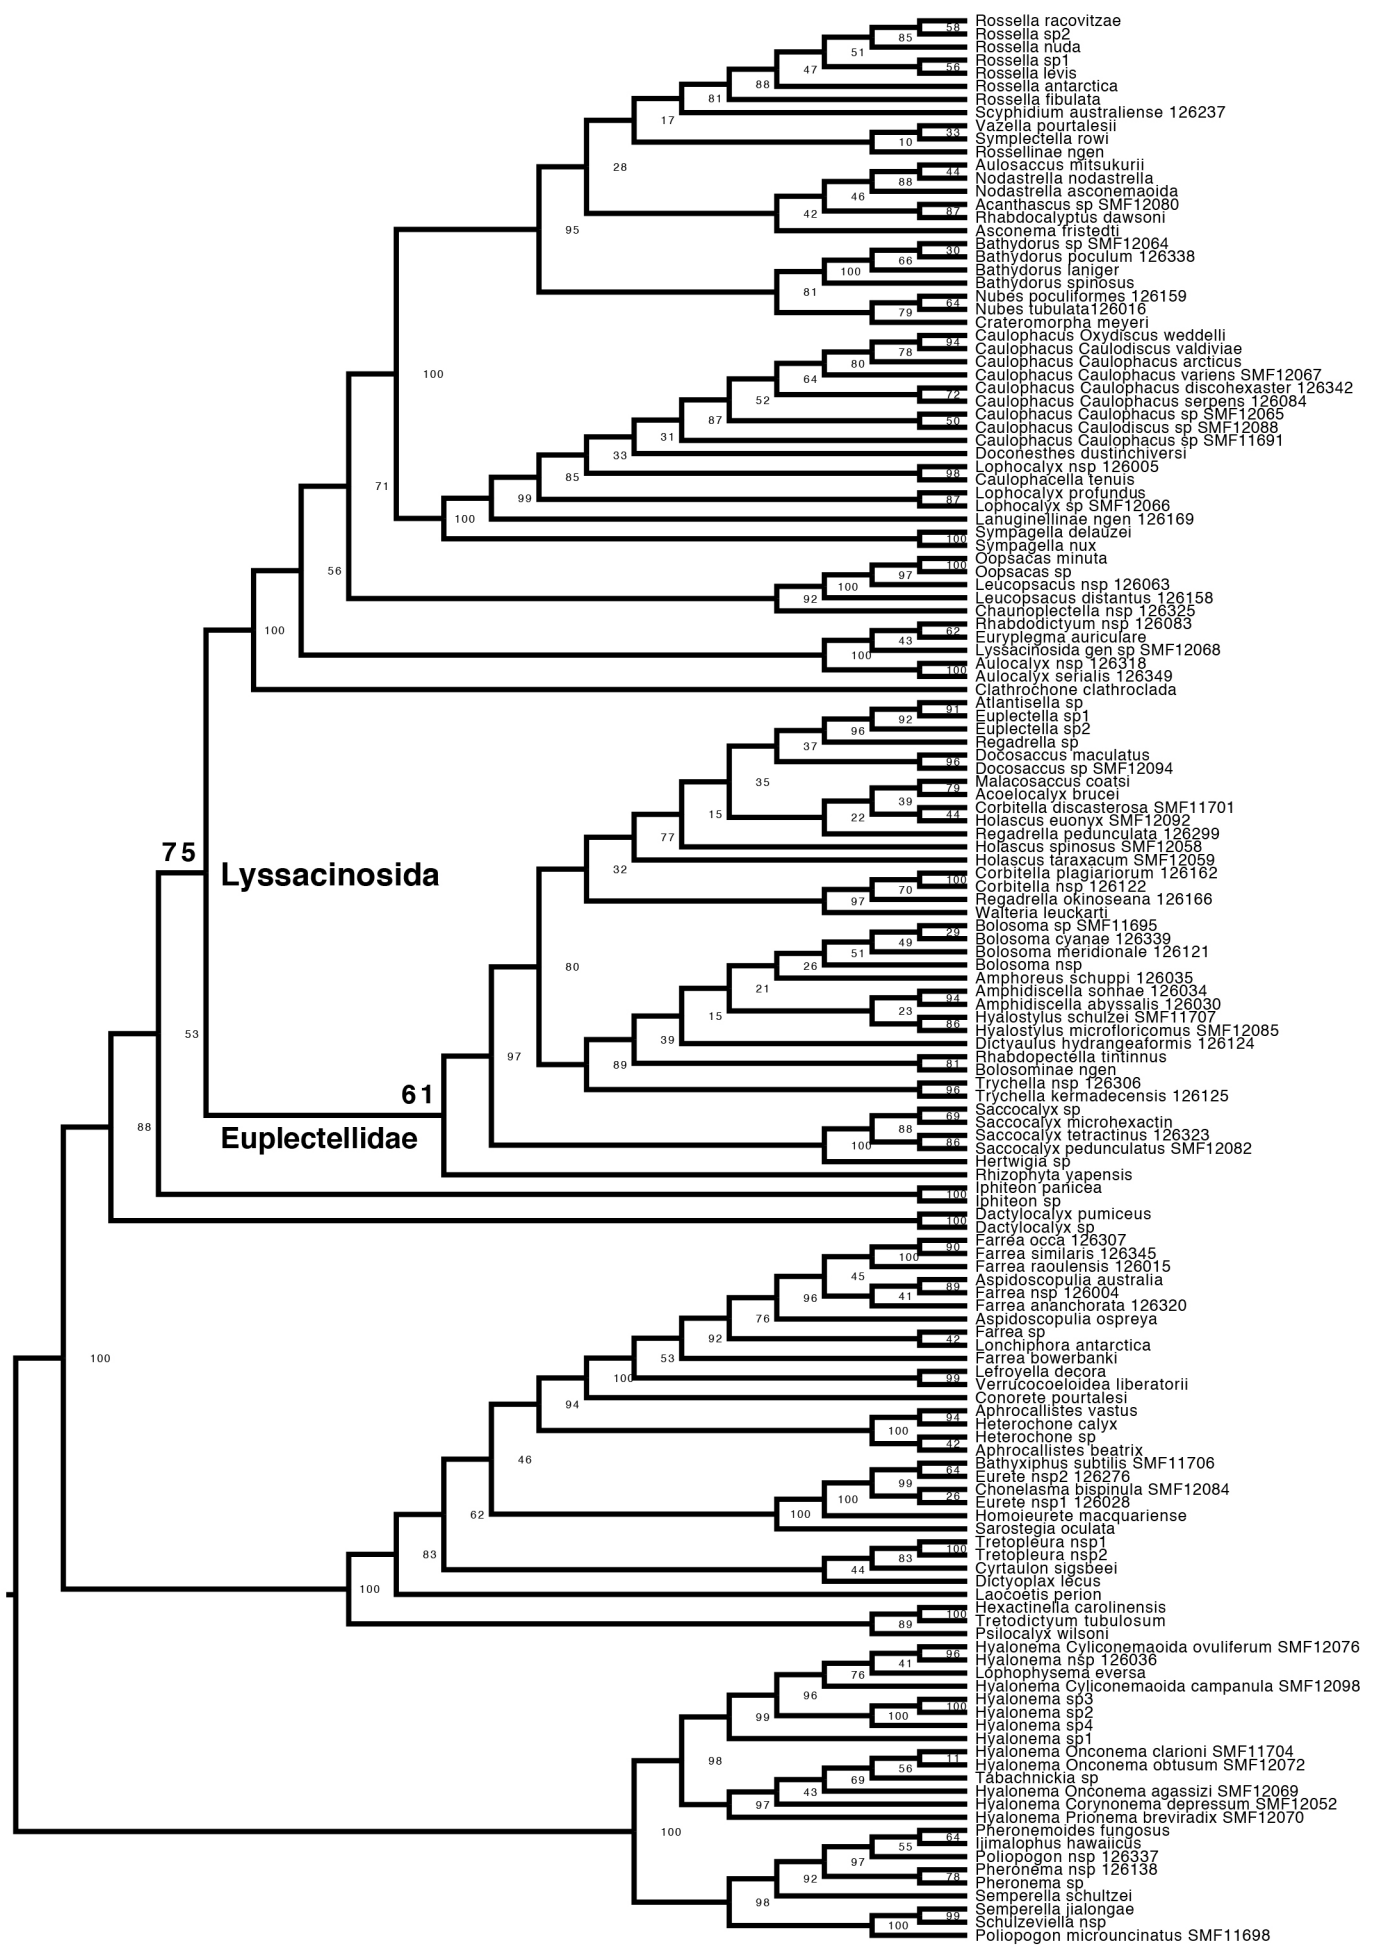

- Rossella racovitzae
- Rossella sp2
- Rossella nuda
- Rossella sp1
- Rossella levis
- Rossella antarctica
- Rossella fibulata
- Scyphidium fibulata
- Vazella poutalesii
- Symplectella rowi
- Rossellinae ngen
- Aulosaccus mitsukurii
- Nodastrella nodastrella
- Nodastrella asconemaoida
- Acanthascus sp SMF12080
- Rhabdocalyptus dawsoni
- Asconema fristedti
- Bathydorus sp SMF12064
- Bathydorus poculum 126338
- Bathydorus aniger
- Bathydorus spinosus
- Nubes poculiformes 126159
- Nubes tubulata126016
- Crateromorpha meyeri
- Caulophacus Oxyciscus weddelli
- Caulophacus Caulodiscus valdiviae
- Caulophacus Caulophacus arcticus
- Caulophacus Caulophacus variens SMF12067
- Caulophacus Caulophacus disconexaster 126342
- Caulophacus Caulophacus serpens 126084
- Caulophacus Caulophacus sp SMF12065
- Caulophacus Caulodiscus sp SMF12088
- Caulophacus Caulophacus sp SMF11691
- Doconesthes dustriehiversi
- Lophocalyx nsp 126005
- Caulophacella tenuis
- Lophocalyx profundus
- Lophocalyx sp SMF12066
- Lanuginellinae ngen 126169
- Sympagella delauzei
- Sympagella nux
- Oopsacas minuta
- Oopsacas sp
- Leucopsacus nsp 126063
- Leucopsacus distantus 126158
- Chaunoplectella nsp 126325
- Rhabdodictyum nsp 126083
- Euryplegma auriculare
- Lyssacinosida gen sp SMF12068
- Aulocalyx nsp 126318
- Aulocalyx serialis 126349
- Ciathrochone ciathroclada
- Atlantiscella sp
- Euplectella sp1
- Euplectella sp2
- Regadrella sp
- Docosaccus maculatus
- Docosaccus sp SMF12094
- Malacosaccus coatsi
- Acoelocalyx brucei
- Corbitella discasterosa SMF11701
- Holascus euonyx SMF12092
- Regadrella pedunculata 126299
- Holascus spinosus SMF12058
- Holascus taraxacum SMF12059
- Corbitella plagiariorum 126162
- Corbitella nsp 126122
- Regadrella okinoseana 126166
- Walteria leuckart
- Bolosoma sp SMF11695
- Bolosoma cyanae 126339
- Bolosoma meridionale 126121
- Bolosoma nsp
- Amphoreus schuppi 126035
- Amphidiscella sohnae 126034
- Amphidiscella abyssalis 126030
- Hyalostylus schulzei SMF11707
- Hyalostylus microfloricomus SMF12085
- Dictyaulus hydrangeaformis 126124
- Rhabdoplectella trinitinus
- Bolosominiae ngen
- Trychella nsp 126306
- Trychella kermadecensis 126125
- Saccocalyx sp
- Saccocalyx microhexactin
- Saccocalyx tetractinus 126323
- Saccocalyx pedunculatus SMF12082
- Hertwigia sp
- Rhizophyta yapensis
- Iphiteon panicea
- Iphiteon sp
- Dactylocalyx pumiceus
- Dactylocalyx sp
- Farrea occa 126307
- Farrea similis 126345
- Farrea raoulensis 126015
- Aspidoscopulia australia
- Farrea nsp 126004
- Farrea ananchorata 126320
- Aspidoscopulia ospreya
- Farrea sp
- Lonchiphora antarctica
- Farrea bowerbanki
- Lefroyella decora
- Verrucocoeloidea liberatorii
- Conorete poutalesi
- Aphrocallystes vastus
- Heterochone calyx
- Heterochone sp
- Aphrocallystes beatrix
- Bathyxiphus subtilis SMF11706
- Eurete nsp2 126270
- Choneiasma bispinula SMF12084
- Eurete nsp1 126028
- Homoieurete macquariense
- Sarostegia oculata
- Tretopleura nsp1
- Tretopleura nsp2
- Cyrtaulon sigsbeeii
- Dictyoplax lecus
- Laocoëtis perion
- Hexactinella carolinensis
- Tretodictyum tubulosum
- Psilocalyx wilsoni
- Hyalonema Cyliconemaoida ovuliferum SMF12076
- Hyalonema nsp 126036
- Lophophysema eversa
- Hyalonema Cyliconemaoida campanula SMF12098
- Hyalonema sp3
- Hyalonema sp2
- Hyalonema sp4
- Hyalonema sp1
- Hyalonema Onconema clarioni SMF11704
- Hyalonema Onconema obtusum SMF12072
- Tabachnickia sp
- Hyalonema Onconema agassizi SMF12069
- Hyalonema Corynonema depressum SMF12052
- Hyalonema Prionema breviradix SMF12070
- Pheronemoides fungosus
- Hyalonema hawaiiensis
- Poliopogon nsp 126337
- Pheronema nsp 126138
- Pheronema sp
- Semperella schultzei
- Semperella jialongae
- Schulzeiella nsp
- Poliopogon microuncinatus SMF11698
